# Supplementary material for: The holistic effects of medical cannabis compared to opioids on pain experience in Finnish patients with chronic pain
Source: J Cannabis Res. 2023 Nov 9;5:38. doi: 10.1186/s42238-023-00207-7 (PMC10634036; doi:10.1186/s42238-023-00207-7)
Supplement: Supplementary file 1 — Additional file 1. [file 42238_2023_207_MOESM1_ESM.xlsx]

## Sheet: Sheet1
Item	Statement, starting with "The medicine..."
1	provides me with a sense of relief
2	has enabled me to gain a sense of normality in my life
3	hinders me from being the best version of myself
4	has improved my life quality
5	has enabled me to regain a sense of control over my life
6	enables me to be the best version of myself
7	is optimal for me
8	makes the pain more tolerable
9	lessens the intensity of the pain
10	eliminates the pain
11	enables me to focus on other things beside the pain
12	enables me to pay more attention to sensations (like wind on my cheek, clock ticking, objects’s textures and patterns)	a
13	makes it more difficult to focus on my environment and what happens around me
14	enables me to feel the pain without reacting to it
15	helps me to take care of myself
16	makes me dizzy
17	enables me to do the things I like
18	makes me drowsy
19	makes me feel powerless (lack energy)
20	enables me to enjoy the company of others
21	causes me negative physical symptoms
22	enables me to sleep better
23	makes me nauseous
24	makes it easier to breathe
25	makes me more active
26	worsens my sleep quality
27	makes me socially withdrawn
28	impairs my memory
29	makes it easier to maintain fous
30	makes my thoughts clearer
31	makes me feel intoxicated
32	makes me remember better
33	makes it hard to focus
34	causes hallucinations
35	makes my thoughts blurry
36	makes me paranoid
37	enables me to do complex tasks (e.g., work, cooking, etc.)
38	makes me more relaxed
39	makes me anxious
40	improves my mood
41	makes me believe more in the future
42	helps me feel more emotionally stable
43	makes me less anxious
44	produces euphoria
45	lowers my mood
Note: item 12 was adapted from the Five Facet Mindfulness Questionnaire

## Sheet: Sheet2
E1_relief	E2_normality	E3_hinders_best_version	E4_improves_life_quality	E5_regain_control	E6_best_version	E7_optimal	E8_more_tolerable	E9_less_intense	E10_eliminates_pain	E11_focus_other	E12_attention_to_sensation	E13_less_focus_environment	E14_no_reaction	E15_care_for_myself	E16_makes_dizzy	E17_do_like	E18_drowsy	E19_powerless	E20_enjoy_company	E21_negative_physical	E22_sleep_better	E23_nauseous	E24_easier_breathe	E25_more_active	E26_worsens_sleep_quality	E27_social_withdrawal	E28_impairs_memory	E29_easier_to_focus	E30_clearer_thoughts	E31_intoxicated	E32_remember_better	E33_hard_to_focus	E34_hallucinations	E35_blurry_thoughts	E36_paranoid	E37_complex_tasks	E38_relaxed	E39_anxious	E40_improve_mood	E41_believe_in_future	E42_emotionally_stable	E43_less_anxious	E44_euphoria	E45_lower_mood
E1_relief
E2_normality
E3_hinders_best_version
E4_improves_life_quality
E5_regain_control
E6_best_version
E7_optimal
E8_more_tolerable
E9_less_intense
E10_eliminates_pain
E11_focus_other
E12_attention_to_sensation
E13_less_focus_environment
E14_no_reaction
E15_care_for_myself
E16_makes_dizzy
E17_do_like
E18_drowsy
E19_powerless
E20_enjoy_company
E21_negative_physical
E22_sleep_better
E23_nauseous
E24_easier_breathe
E25_more_active
E26_worsens_sleep_quality
E27_social_withdrawal
E28_impairs_memory
E29_easier_to_focus
E30_clearer_thoughts
E31_intoxicated
E32_remember_better
E33_hard_to_focus
E34_hallucinations
E35_blurry_thoughts
E36_paranoid
E37_complex_tasks
E38_relaxed
E39_anxious
E40_improve_mood
E41_believe_in_future
E42_emotionally_stable
E43_less_anxious
E44_euphoria
E45_lower_mood
